# Supplementary figures and images for: Tumor-induced Stromal STAT1 Accelerates Breast Cancer via Deregulating Tissue Homeostasis
Source: Oxford University Press journal article supplement (doi:10.1158/1541-7786.mcr-16-0312), 2017-01-21

Supplementary Figure 5

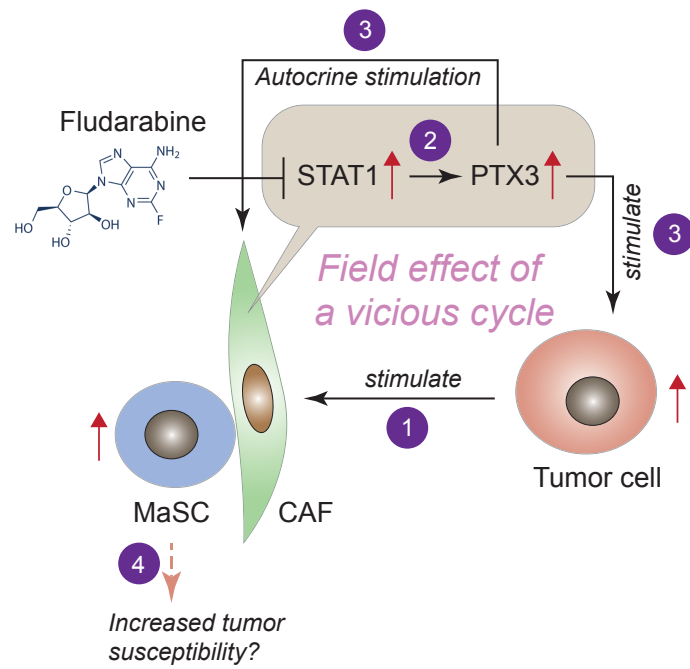

Supplement: 15417786mcr160312-sup-171817_1_supp_3781972_tt5dwk.pdf [file 15417786mcr160312-sup-171817_1_supp_3781972_tt5dwk.pdf]
